# Supplementary material for: Kinetic and Isothermal Investigations on the Use of Low Cost Coconut Fiber-Polyaniline Composites for the Removal of Chromium from Wastewater
Source: MDPI journal article supplement (doi:10.3390/polym14204264), 2022-10-11
Supplement: s1 [file s1]

# Kinetic and Isothermal Investigations on the Use of Low Cost Coconut Fiber-Polyaniline Composites for the Removal of Chromium from Wastewater

StutiJha<sup>1</sup>, Rama Gaur <sup>1,\*</sup>, Syed Shahabuddin<sup>1,\*</sup>, Irfan Ahmad <sup>2</sup> and Nanthini Sridewi<sup>3,\*</sup>

<sup>1</sup> Department of Chemistry, School of Technology, Pandit Deendayal Energy University, Knowledge Corridor, Raysan, Gandhinagar 382426, Gujarat, India.

<sup>2</sup> Department of Clinical Laboratory Sciences, College of Applied Medical Sciences, King Khalid University, Abha 61421, Saudi Arabia

<sup>3</sup> Department of Maritime Science and Technology, Faculty of Defence Science and Technology, National Defence University of Malaysia, Kuala Lumpur 57000, Malaysia

\* Correspondence: rama.gaur@sot.pdpu.ac.in (R.G.); syedshahab.hyd@gmail.com (S.S.) or syed.shahabuddin@sot.pdpu.ac.in; nanthini@upnm.edu.my (N.S.); Tel.: +91-8585932338 (S.S.); +60-124-675-320 (N.S.)

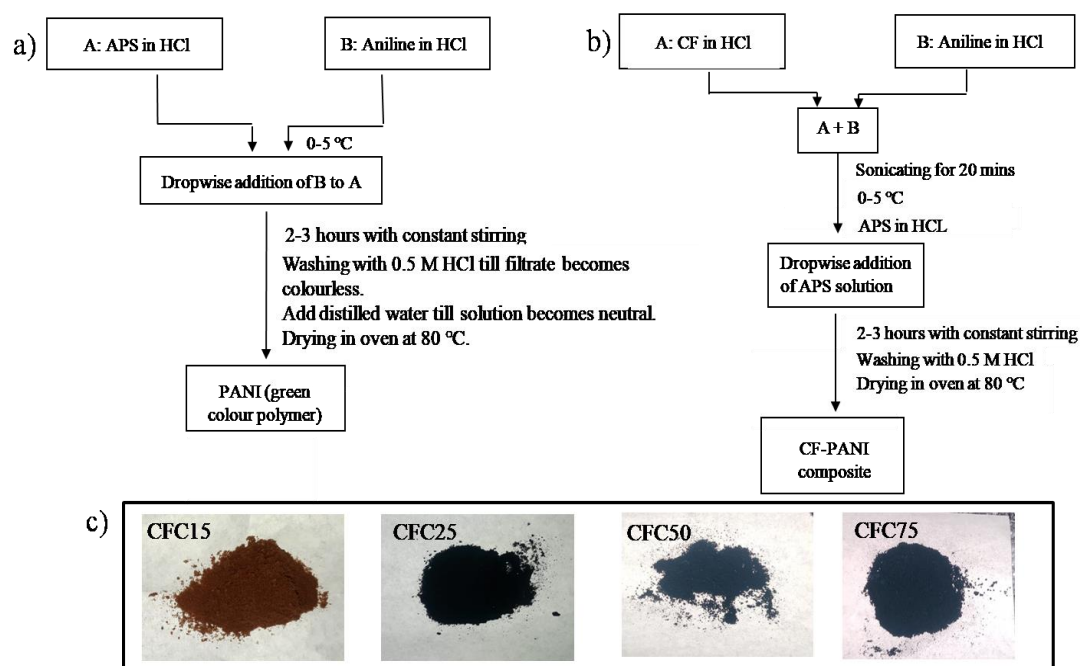

**Figure S1.** Schematicflow for the synthesis of a) PANI, b) CF-PANI composites, and c) the digital images of the prepared samples.

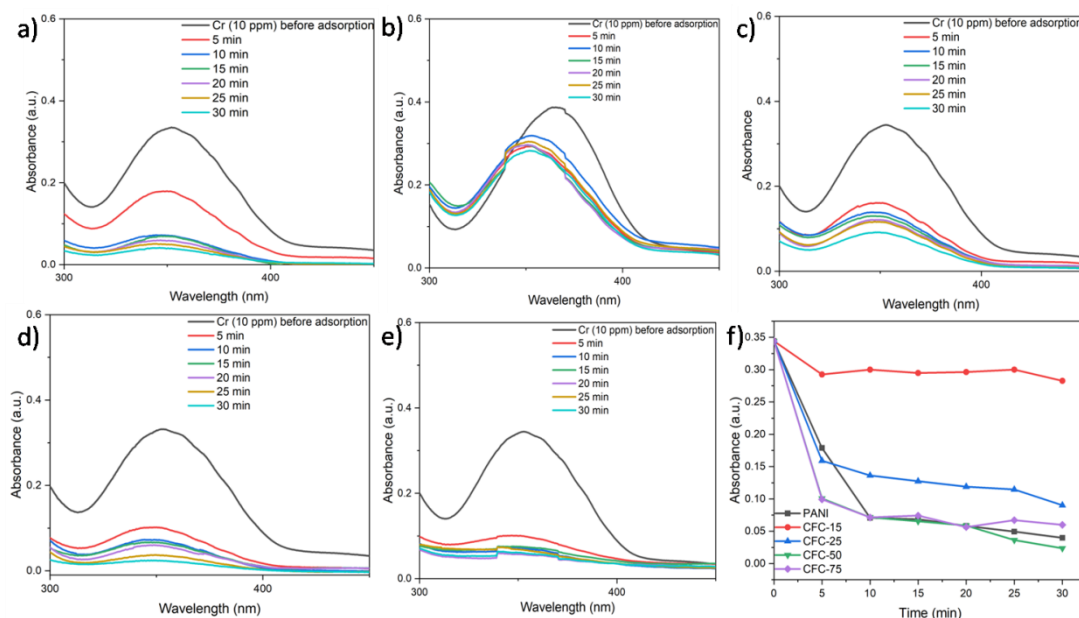

**Figure S2.** UV-Vis absorbance spectra for the kinetic studies at different time intervals of time a) PANI b) CFC15 c) CFC25 d) CFC50 e) CFC75 (pH = 6, adsorbent dosage = 0.25 mg/ml, Cr concentration = 10 ppm, total contact time = 30 mins) f) Absorbance (at  $\lambda_{\text{max}} = 352 \text{ nm}$ ) vs. time of prepared composites for Cr(VI).

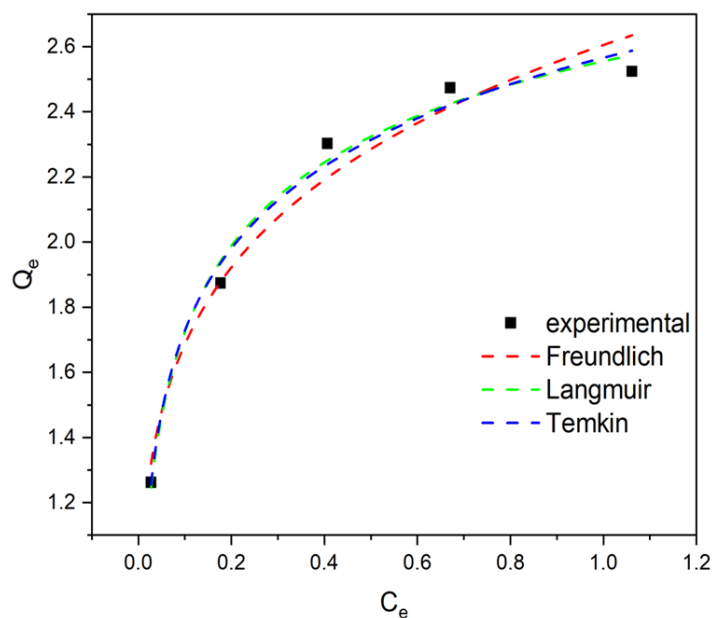

**Figure S3.** Freundlich, Langmuir, and Temkin isotherm models for different concentration of Cr(VI) by CFC50 (pH = 6, adsorbent dosage = 0.25 mg/ml, Cr concentration = 10 ppm to 50 ppm, contact time = 30 mins).

**Table S1.** Linear equation forms for different kinetic models.

| Kinetic model           | Linear equation                                                  |
|-------------------------|------------------------------------------------------------------|
| First order             | $\ln C = -kt + \ln C_0$                                          |
| Pseudo first order      | $\ln(q_e - q_t) = \ln q_e - k_1 t$                               |
| Second order            | $\frac{1}{C} = kt + \ln C_0$                                     |
| Pseudo second order     | $\frac{t}{q_t} = \frac{1}{k_2 q_e^2} + \frac{t}{q_e}$            |
| Intraparticle diffusion | $q_t = k_d t^{0.5} + C$                                          |
| Elovich model           | $q_t = \frac{1}{\beta} \ln(\alpha\beta) + \frac{1}{\beta} \ln t$ |

NOTE: C = final concentration of adsorbate after adsorption; k = rate constant; t = time; C<sub>0</sub> = initial concentration of the adsorbate before adsorption; q<sub>e</sub> = amount of adsorption at equilibrium; q<sub>t</sub> = amount of adsorption at equilibrium; α = initial sorption rate constant; β = desorption constant.

**Table S2.** Linear and non-linear equations for Freundlich, Langmuir, and Temkin isotherm models.

| Isotherm model      | Linear form                                                     | Non-linear form                         |
|---------------------|-----------------------------------------------------------------|-----------------------------------------|
| Freundlich isotherm | $\ln q_e = \ln K_f + n \ln C_e$                                 | $q_e = K_f C_e^{\frac{1}{n}}$           |
| Langmuir isotherm   | $\frac{1}{q_e} = \frac{1}{q_{max} b C_e} + \frac{1}{q_{max} b}$ | $q_e = \frac{q_{max} b C_e}{1 + b C_e}$ |
| Temkin isotherm     | $q_e = \frac{RT}{b_T} \ln K_T + \frac{RT}{b_T} \ln C_e$         | $q_e = \frac{RT}{b_T} \ln(K_T C_e)$     |

NOTE: q<sub>e</sub> = amount of adsorption at equilibrium; C<sub>e</sub> = concentration of adsorbate at equilibrium; K<sub>f</sub> = Freundlich adsorption capacity constant; q<sub>max</sub> = maximum monolayer adsorption capacity of adsorbent; b = constant related to affinity between adsorbent and adsorbate; R = gas constant; T = Temperature; b<sub>T</sub> = Temkin constant related to heat of sorption; K<sub>T</sub> = Temkin isotherm constant.
